# Supplementary material
Source: publisher figshare collection journal article supplement (https://gsajournals.figshare.com/articles/dataset/_/6938171)
Supplement: Supplementary file 1 [file 1]

**Figure S1**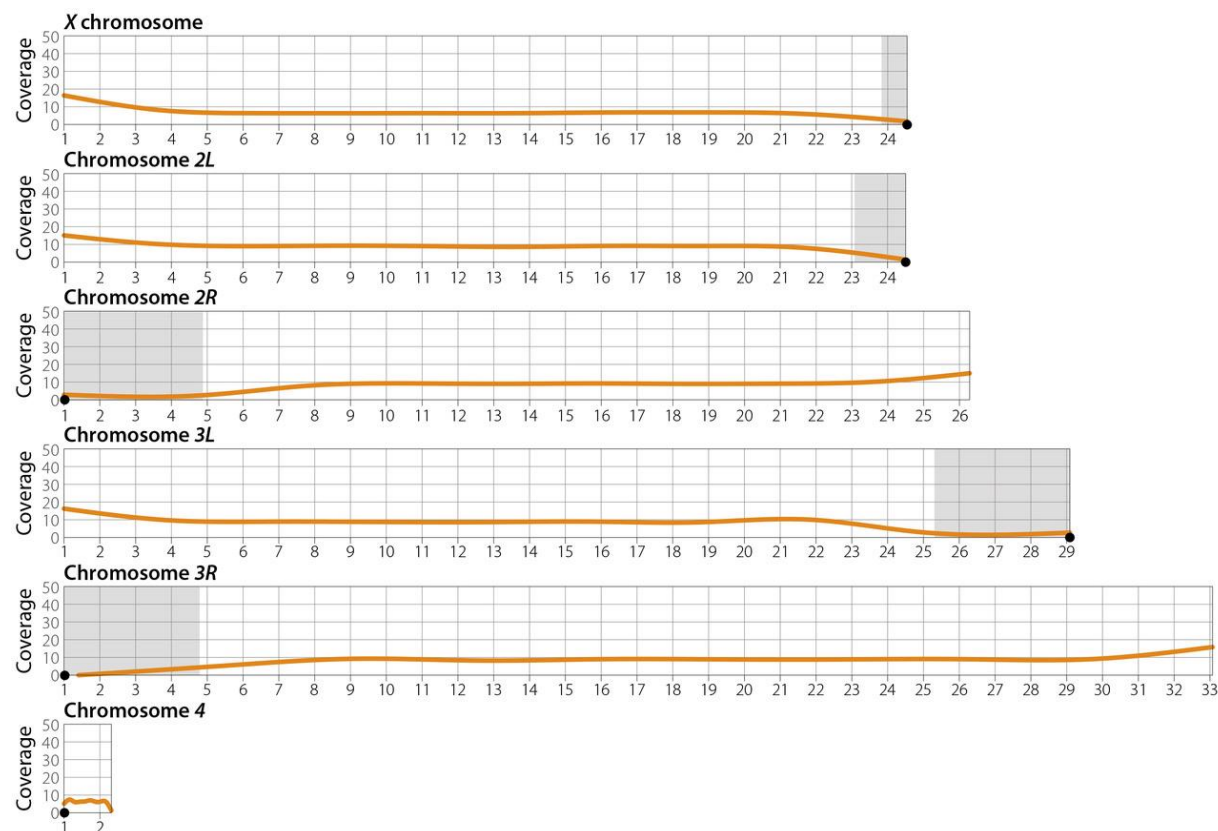

**Figure S1** Depth of coverage was calculated using reads that uniquely map to non-repetitive regions of release 6 of the *D. melanogaster* genome. Black circles indicate centromeres, gray boxes are the approximate position of heterochromatin. Coverage was calculated in 5-kb non-overlapping windows. Coverage is relatively even across all five chromosome arms, suggesting the absence of euchromatic sequence on the B chromosomes.

**Figure S2**

**Figure S2** Fluorescent *in situ* hybridization (FISH) on chromosome spreads from neuroblast squashes. Probes recognizing the AAGAG simple satellite repeat hybridized to the B chromosomes (A), but probes for the AACAC repeat (B), AACATAGAAT repeat (C), AAAAG repeat (D), or the intergenic spacer (IGS) between ribosomal DNA repeats (E and F) did not hybridize to the B chromosomes. See Table S2 for probe details. Scale bar = 5  $\mu$ m

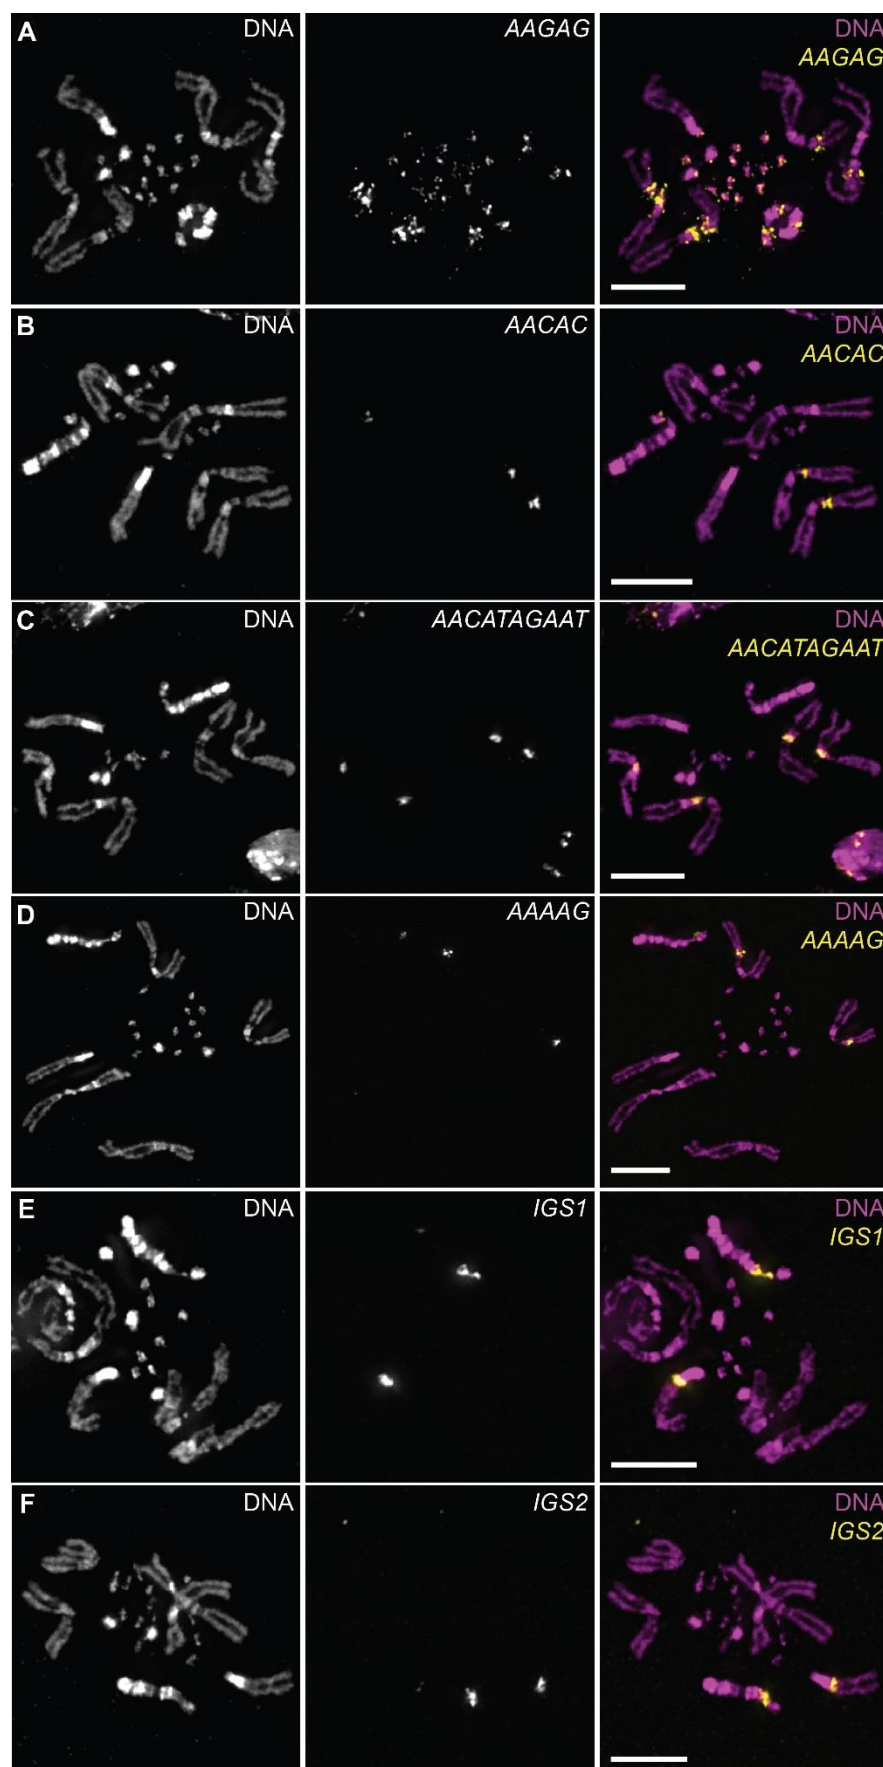

**Figure S3**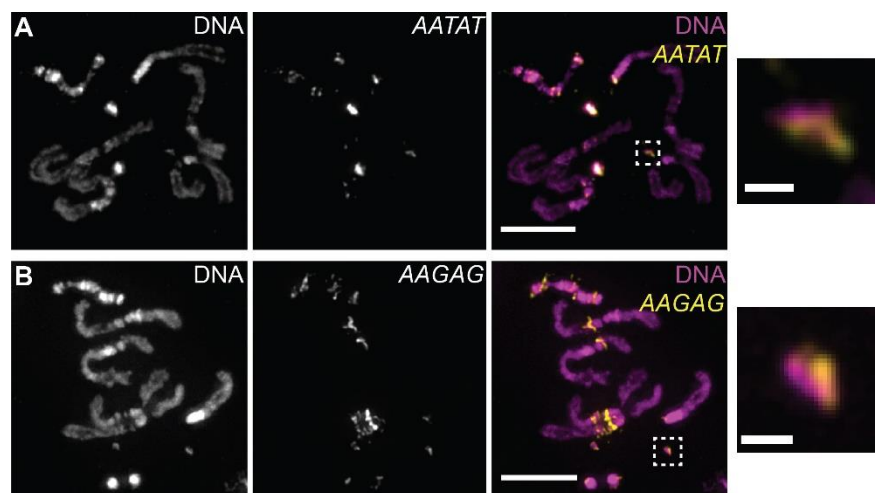

**Figure S3** The B2 chromosome carries the same suite of satellite repeats as the B1 chromosome. FISH probes recognizing the *AATAT* (A) and the *AAGAG* (B) satellite repeat hybridize to the B2 chromosome in metaphase chromosome spreads. Scale bar in whole spreads = 5 μm; scale bar in magnifications = 0.5 μm.

**Figure S4**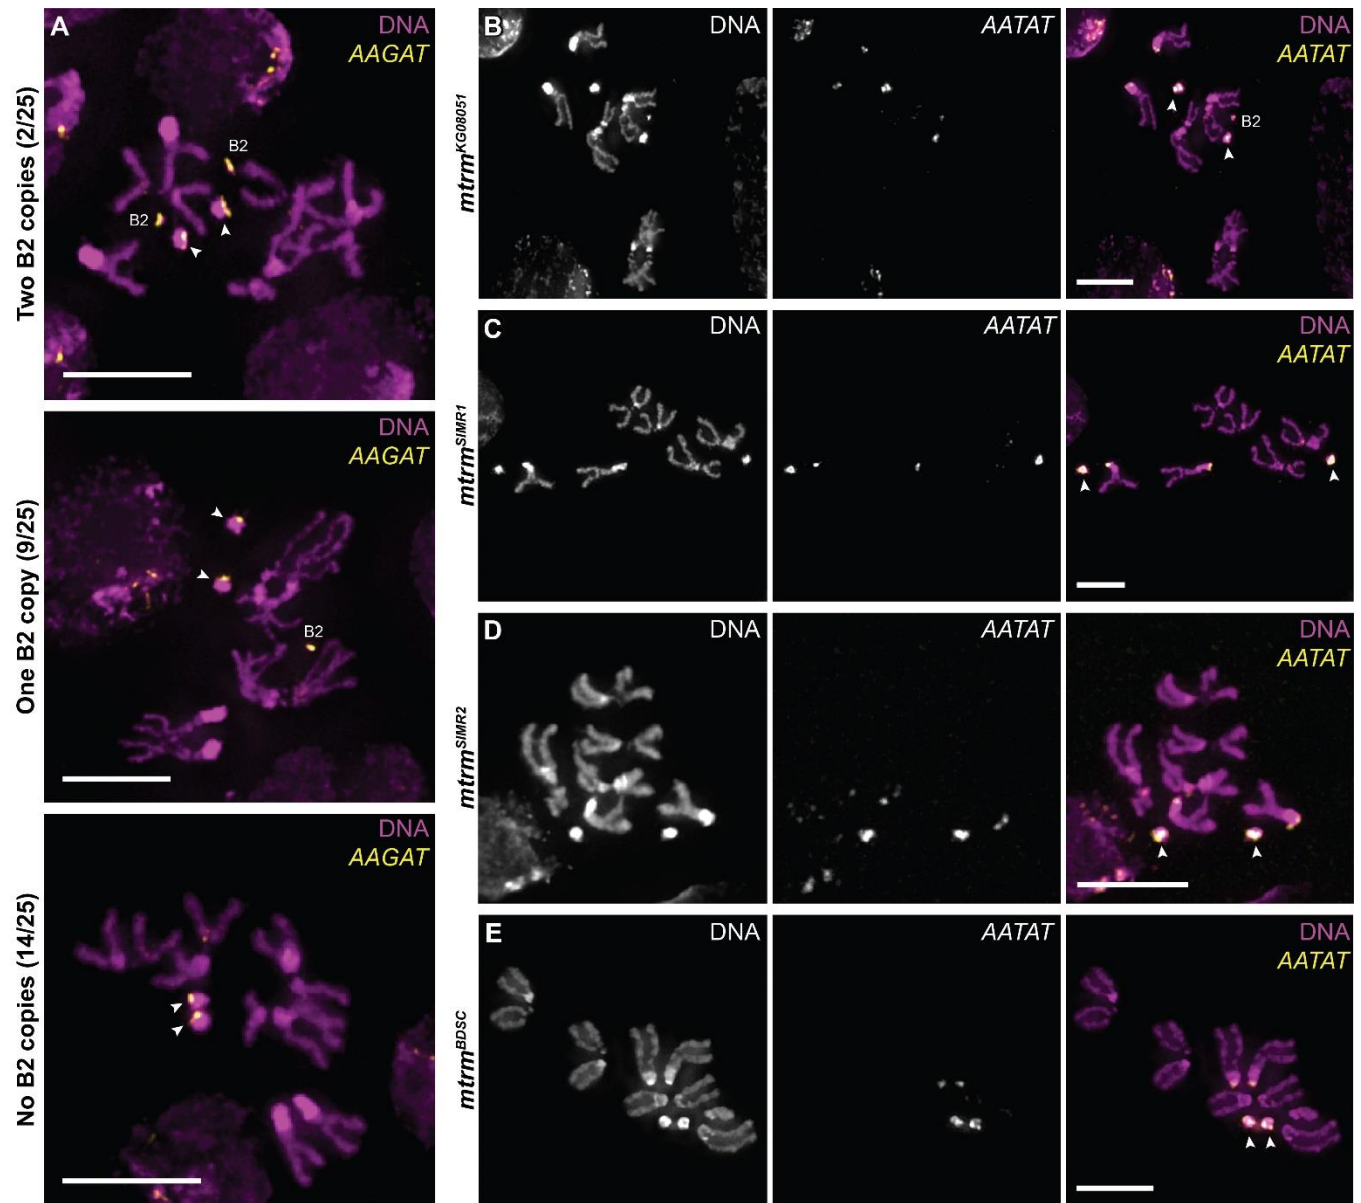

**Figure S4** B chromosomes are only found in the laboratory *mtrm*<sup>KG08051</sup> stock. (A) FISH with the AAGAT probe on metaphase chromosome spreads from ovary tissue of *mtrm*<sup>KG08051</sup> females.

Examination of 25 individuals showed two carried two copies of the B2 chromosome, nine carried one copy, and the remaining 14 did not carry any. FISH with the AATAT probe on metaphase chromosome spreads from ovary tissue of *mtrm*<sup>KG08051</sup> (B), *mtrm*<sup>SIMR1</sup> (C), *mtrm*<sup>SIMR2</sup> (D), and *mtrm*<sup>BDSC</sup> (E) females.

**Table S1** *Drosophila melanogaster* stocks used in this study.

| Name                           | Genotype                                                                                                      | Type of B chromosome (if present) | Average number of B chromosomes (if present) | Comments                                                                           |
|--------------------------------|---------------------------------------------------------------------------------------------------------------|-----------------------------------|----------------------------------------------|------------------------------------------------------------------------------------|
| <i>mtrm</i> <sup>126</sup>     | <i>y w/y<sup>+</sup> Y; mtrm</i> <sup>126</sup> / <i>TM3, Sb Ser; sv</i> <sup>spa-pol</sup>                   | B1                                | 10–12                                        | Stock with original B (B1) chromosomes; documented in Bauerly <i>et al.</i> (2014) |
| <i>mtrm</i> <sup>KG08051</sup> |                                                                                                               | B2                                | 1                                            | Kept in our laboratory collection                                                  |
| <i>mtrm</i> <sup>SIMR1</sup>   | <i>y</i> <sup>1</sup> ; <i>P{SUPor-P}Exo70</i> <sup>KG08051</sup>                                             | None found                        | N/A                                          | Housed in the Stowers Institute collection                                         |
| <i>mtrm</i> <sup>SIMR2</sup>   | <i>mtrm</i> <sup>KG08051</sup> <i>ry</i> <sup>506</sup> / <i>TM3, Sb</i> <sup>1</sup> <i>Ser</i> <sup>1</sup> | None found                        | N/A                                          | Housed in the Stowers Institute collection                                         |
| <i>mtrm</i> <sup>BDSC</sup>    |                                                                                                               | None found                        | N/A                                          | Obtained from Bloomington Drosophila Stock Center; stock number 14932              |
| wild-type (WT)                 | <i>y w/y<sup>+</sup> Y; sv</i> <sup>spa-pol</sup>                                                             | None                              | N/A                                          | Hawley lab WT                                                                      |

**Table S2** Fluorescent probes used for FISH in this study.

| Probe name | Sequence 5'→3'                  | Fluorophore <sup>a</sup> |
|------------|---------------------------------|--------------------------|
| AATAT      | AATATAATATAATATAATATAATATAATAT  | Alexa Fluor 546          |
| AAGAG      | AAGAGAAGAGAAGAGAAGAGAAGAGAAGAG  | Alexa Fluor 488          |
| AAGAT      | AAGATAAGATAAGATAAGATAAGATAAGAT  | Alexa Fluor 488          |
| AACAC      | AACACAACACAACACAACACAACACAACAC  | Alexa Fluor 488          |
| AAAAG      | AAAAGAAAAGAAAAGAAAAGAAAAGAAAAG  | Alexa Fluor 488          |
| AATAACATAG | AACATAGAATAACATAGAATAACATAGAAT  | Alexa Fluor 488          |
| IGS1       | GTATGTGTTTCATATGATTTTGGCAATTATA | Alexa Fluor 555          |
| IGS2       | ATATTCCCATATTCTCTAAGTATTATAGAG  | Alexa Fluor 555          |

<sup>a</sup> Probes are conjugated to an Alexa Fluor dye at the 5' end and were produced by Integrated DNA Technologies (IDT) except for the two IGS probes, which were produced by Eurofins.

**Table S3** Depth of coverage across chromosomes.

| Chromosome<br>or arm | Estimated size (bp) | Mapped reads <sup>a</sup> | % of all<br>mapped reads | Depth of<br>coverage (x) |
|----------------------|---------------------|---------------------------|--------------------------|--------------------------|
| X                    | 23,542,271          | 2,128,775                 | 16%                      | 14                       |
| 2L                   | 23,513,712          | 1,770,270                 | 14%                      | 11                       |
| 2R                   | 25,286,936          | 2,067,093                 | 16%                      | 12                       |
| 3L                   | 28,110,227          | 2,017,347                 | 15%                      | 11                       |
| 3R                   | 32,079,331          | 2,325,354                 | 18%                      | 11                       |
| 4                    | 1,348,131           | 683,865                   | 5%                       | 76                       |
| Y                    | 3,667,352           | 625,677                   | 5%                       | 26                       |
| <b>All</b>           | <b>133,880,608</b>  | <b>13,031,938</b>         | <b>100%</b>              | <b>10</b>                |

<sup>a</sup> All read lengths were 150 bp.

**Table S4** Alignment of unmapped reads to contigs.

| <b>Chromosome</b>      | <b>Base pairs with more than 100 reads aligning to them</b> | <b>Chromosome size</b> | <b>Percentage of chromosome covered by more than 100 reads</b> |
|------------------------|-------------------------------------------------------------|------------------------|----------------------------------------------------------------|
| chrUn_DS485957v1       | 877                                                         | 1,013                  | 87%                                                            |
| chrUn_DS483562v1       | 40,698                                                      | 50,625                 | 80%                                                            |
| chrUn_DS485102v1       | 918                                                         | 1,240                  | 74%                                                            |
| chrUn_DS483906v1       | 2,293                                                       | 3,924                  | 58%                                                            |
| chrUn_DS485695v2       | 285                                                         | 564                    | 51%                                                            |
| chrUn_DS485504v1       | 462                                                         | 1,123                  | 41%                                                            |
| chrUn_DS483770v1       | 2,481                                                       | 6,193                  | 40%                                                            |
| chrUn_DS484689v1       | 659                                                         | 1,650                  | 40%                                                            |
| chrX_DS485647v1_random | 423                                                         | 1,086                  | 39%                                                            |
| chrUn_DS485995v1       | 344                                                         | 1,004                  | 34%                                                            |
| chrX_DS484701v1_random | 526                                                         | 1,625                  | 32%                                                            |
| chrX_DS485351v1_random | 353                                                         | 1,161                  | 30%                                                            |
| chrUn_DS485073v1       | 381                                                         | 1,259                  | 30%                                                            |
| chrUn_DS484972v1       | 389                                                         | 1,310                  | 30%                                                            |
| chrX_DS484765v1_random | 416                                                         | 1,516                  | 27%                                                            |
| chrUn_DS485390v1       | 306                                                         | 1,152                  | 27%                                                            |
| chrX_DS485514v1_random | 293                                                         | 1,121                  | 26%                                                            |
| chrUn_DS485433v1       | 283                                                         | 1,140                  | 25%                                                            |
| chrUn_DS485341v1       | 278                                                         | 1,162                  | 24%                                                            |
| chrUn_DS485255v1       | 273                                                         | 1,190                  | 23%                                                            |
| chrX_DS484555v1_random | 415                                                         | 1,916                  | 22%                                                            |
| chrUn_DS485958v1       | 219                                                         | 1,013                  | 22%                                                            |
| chrUn_DS485340v1       | 242                                                         | 1,163                  | 21%                                                            |
| chrUn_DS484751v1       | 303                                                         | 1,533                  | 20%                                                            |
| chrX_DS484187v1_random | 526                                                         | 2,671                  | 20%                                                            |
| chrUn_DS485249v1       | 233                                                         | 1,192                  | 20%                                                            |
| chrUn_DS484861v1       | 267                                                         | 1,395                  | 19%                                                            |
| chrUn_DS484567v1       | 360                                                         | 1,900                  | 19%                                                            |
| chrX_DS484626v1_random | 335                                                         | 1,786                  | 19%                                                            |
| chrUn_DS485984v1       | 187                                                         | 1,006                  | 19%                                                            |
| chrX_DS485855v1_random | 188                                                         | 1,037                  | 18%                                                            |
| chrX_DS483818v1_random | 865                                                         | 4,917                  | 18%                                                            |
| chrUn_DS485386v1       | 200                                                         | 1,153                  | 17%                                                            |
| chrX_DS484995v1_random | 216                                                         | 1,296                  | 17%                                                            |
| chrX_DS484529v1_random | 314                                                         | 1,947                  | 16%                                                            |
| chrUn_DS484748v1       | 243                                                         | 1,538                  | 16%                                                            |
| chrX_DS484679v1_random | 265                                                         | 1,683                  | 16%                                                            |
| chrUn_DS484938v1       | 203                                                         | 1,334                  | 15%                                                            |



| <b>Chromosome</b>      | <b>Base pairs with more than 100 reads aligning to them</b> | <b>Chromosome size</b> | <b>Percentage of chromosome covered by more than 100 reads</b> |
|------------------------|-------------------------------------------------------------|------------------------|----------------------------------------------------------------|
| chrX_DS484610v1_random | 261                                                         | 1,813                  | 14%                                                            |
| chrX_DS485141v1_random | 165                                                         | 1,228                  | 13%                                                            |
| chrUn_DS484280v1       | 319                                                         | 2,438                  | 13%                                                            |
| chrUn_DS485773v1       | 135                                                         | 1,054                  | 13%                                                            |
| chrX_DS484809v1_random | 183                                                         | 1,453                  | 13%                                                            |
| chrX_DS485599v1_random | 131                                                         | 1,100                  | 12%                                                            |
| chrX_DS484556v1_random | 226                                                         | 1,916                  | 12%                                                            |
| chrY_CP007111v1_random | 4,039                                                       | 34,521                 | 12%                                                            |
| chrUn_DS484106v1       | 330                                                         | 2,884                  | 11%                                                            |
| chrUn_DS485086v1       | 142                                                         | 1,250                  | 11%                                                            |
| chrUn_DS484923v1       | 148                                                         | 1,343                  | 11%                                                            |
| chrX_DS484955v1_random | 144                                                         | 1,323                  | 11%                                                            |
| chrX_DS484582v1_random | 198                                                         | 1,870                  | 11%                                                            |
| chrX_DS484677v1_random | 175                                                         | 1,687                  | 10%                                                            |
| chrX_DS485081v1_random | 129                                                         | 1,252                  | 10%                                                            |
| chrX_DS485765v1_random | 108                                                         | 1,056                  | 10%                                                            |
| chrUn_DS484007v1       | 327                                                         | 3,262                  | 10%                                                            |
| chrX_DS484507v1_random | 192                                                         | 1,978                  | 10%                                                            |
| chrX_DS485735v1_random | 99                                                          | 1,063                  | 9%                                                             |
| chrUn_DS484484v1       | 182                                                         | 2,020                  | 9%                                                             |
| chrUn_DS484180v1       | 240                                                         | 2,697                  | 9%                                                             |
| chrUn_DS485919v1       | 86                                                          | 1,021                  | 8%                                                             |
| chrX_DS484057v1_random | 259                                                         | 3,076                  | 8%                                                             |
| chrX_DS484730v1_random | 131                                                         | 1,560                  | 8%                                                             |
| chrX_DS484672v1_random | 135                                                         | 1,703                  | 8%                                                             |
| chrX_DS484695v1_random | 129                                                         | 1,637                  | 8%                                                             |
| chrUn_DS484068v1       | 233                                                         | 3,013                  | 8%                                                             |
| chrX_DS485454v1_random | 82                                                          | 1,135                  | 7%                                                             |
| chrX_DS484388v1_random | 159                                                         | 2,209                  | 7%                                                             |
| chrX_DS484618v1_random | 128                                                         | 1,800                  | 7%                                                             |
| chrUn_DS483954v1       | 247                                                         | 3,554                  | 7%                                                             |
| chrUn_DS483918v1       | 260                                                         | 3,818                  | 7%                                                             |
| chrX_DS484545v1_random | 131                                                         | 1,928                  | 7%                                                             |
| chrX_DS484429v1_random | 136                                                         | 2,113                  | 6%                                                             |
| chrX_DS484433v1_random | 130                                                         | 2,109                  | 6%                                                             |
| chrX_DS484664v1_random | 105                                                         | 1,713                  | 6%                                                             |
| chrX_DS484361v1_random | 139                                                         | 2,282                  | 6%                                                             |
| chrY_DS484094v1_random | 177                                                         | 2,922                  | 6%                                                             |
| chrY_DS483677v1_random | 747                                                         | 12,513                 | 6%                                                             |
| chrX_DS483955v1_random | 210                                                         | 3,553                  | 6%                                                             |

| <b>Chromosome</b>      | <b>Base pairs with more than 100 reads aligning to them</b> | <b>Chromosome size</b> | <b>Percentage of chromosome covered by more than 100 reads</b> |
|------------------------|-------------------------------------------------------------|------------------------|----------------------------------------------------------------|
| chrX_DS484647v1_random | 102                                                         | 1,743                  | 6%                                                             |
| chrUn_DS483755v1       | 382                                                         | 6,936                  | 6%                                                             |
| chrX_DS484580v1_random | 91                                                          | 1,871                  | 5%                                                             |
| chrUn_DS484183v1       | 130                                                         | 2,688                  | 5%                                                             |
| chrUn_DS484226v1       | 118                                                         | 2,576                  | 5%                                                             |
| chrX_DS484305v1_random | 101                                                         | 2,389                  | 4%                                                             |
| chrX_DS483803v1_random | 218                                                         | 5,232                  | 4%                                                             |
| chrX_DS484046v1_random | 125                                                         | 3,123                  | 4%                                                             |
| chrX_DS484023v1_random | 115                                                         | 3,206                  | 4%                                                             |
| chrX_DS484600v1_random | 66                                                          | 1,841                  | 4%                                                             |
| chrUn_CP007100v1       | 329                                                         | 10,091                 | 3%                                                             |
| chrX_DS485898v1_random | 33                                                          | 1,028                  | 3%                                                             |
| chrX_DS484430v1_random | 62                                                          | 2,113                  | 3%                                                             |
| chrX_DS484344v1_random | 60                                                          | 2,322                  | 3%                                                             |
| chrUn_DS484320v1       | 59                                                          | 2,369                  | 2%                                                             |
| chrUn_CP007120v1       | 1,855                                                       | 76,973                 | 2%                                                             |
| chrUn_DS484591v1       | 43                                                          | 1,854                  | 2%                                                             |
| chrX_DS483655v1_random | 299                                                         | 13,549                 | 2%                                                             |
| chrUn_DS484054v1       | 65                                                          | 3,080                  | 2%                                                             |
| chrX_DS484178v1_random | 56                                                          | 2,698                  | 2%                                                             |
| chrX_DS485801v1_random | 21                                                          | 1,048                  | 2%                                                             |
| chrUn_DS485897v1       | 20                                                          | 1,028                  | 2%                                                             |
| chrX_DS484697v1_random | 31                                                          | 1,636                  | 2%                                                             |
| chrX_DS484166v1_random | 48                                                          | 2,750                  | 2%                                                             |
| chrUn_DS485297v1       | 20                                                          | 1,178                  | 2%                                                             |
| chrX_DS483950v1_random | 56                                                          | 3,582                  | 2%                                                             |
| chrY_DS484956v1_random | 20                                                          | 1,322                  | 2%                                                             |
| chrUn_DS484720v1       | 20                                                          | 1,586                  | 1%                                                             |
| chrX_DS484725v1_random | 18                                                          | 1,573                  | 1%                                                             |
| chrUn_DS483650v1       | 155                                                         | 13,906                 | 1%                                                             |
| chrUn_DS484241v1       | 28                                                          | 2,547                  | 1%                                                             |
| chr4                   | 11,185                                                      | 1,348,131              | 1%                                                             |
| chrUn_DS484309v1       | 18                                                          | 2,384                  | 1%                                                             |
| chrUn_DS485261v1       | 8                                                           | 1,189                  | 1%                                                             |
| chrY_CP007110v1_random | 207                                                         | 33,316                 | 1%                                                             |
| chrUn_DS483707v1       | 151                                                         | 25,840                 | 1%                                                             |
| chrUn_CP007083v1       | 148                                                         | 25,537                 | 1%                                                             |
| chrUn_DS483705v1       | 145                                                         | 27,456                 | 1%                                                             |
| chrUn_DS483681v1       | 65                                                          | 12,368                 | 1%                                                             |
| chrUn_DS483921v1       | 20                                                          | 3,806                  | 1%                                                             |

| <b>Chromosome</b>       | <b>Base pairs with more than 100 reads aligning to them</b> | <b>Chromosome size</b> | <b>Percentage of chromosome covered by more than 100 reads</b> |
|-------------------------|-------------------------------------------------------------|------------------------|----------------------------------------------------------------|
| chrUn_DS484093v1        | 11                                                          | 2,922                  | 0%                                                             |
| chrUn_CP007088v1        | 133                                                         | 37,106                 | 0%                                                             |
| chrUn_DS483774v1        | 20                                                          | 6,041                  | 0%                                                             |
| chrX_CP007103v1_random  | 89                                                          | 33,320                 | 0%                                                             |
| chrY_CP007119v1_random  | 20                                                          | 11,498                 | 0%                                                             |
| chrY_CP007112v1_random  | 67                                                          | 39,041                 | 0%                                                             |
| chrUn_DS483675v1        | 20                                                          | 12,536                 | 0%                                                             |
| chrUn_DS483736v1        | 20                                                          | 14,006                 | 0%                                                             |
| chrX_DS484393v1_random  | 3                                                           | 2,201                  | 0%                                                             |
| chrY                    | 4,689                                                       | 3,667,352              | 0%                                                             |
| chrUn_CP007091v1        | 21                                                          | 20,763                 | 0%                                                             |
| chrX                    | 22,771                                                      | 23,542,271             | 0%                                                             |
| chrUn_CP007095v1        | 20                                                          | 25,560                 | 0%                                                             |
| chrY_CP007116v1_random  | 20                                                          | 25,805                 | 0%                                                             |
| chrUn_CP007081v1        | 60                                                          | 88,768                 | 0%                                                             |
| <b>Total base pairs</b> | <b>114,673</b>                                              |                        |                                                                |
